# Supplementary material
Source: PubMed Central journal article supplement (PMC6340473)
Supplement: msy191_supp.pdf [file msy191_supp.pdf]

Suppl. Fig. 1

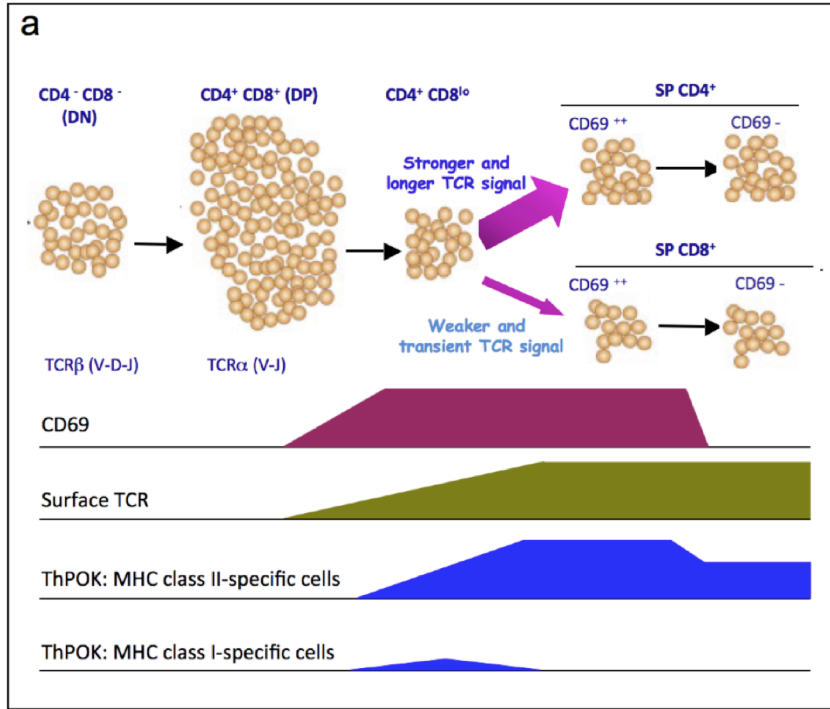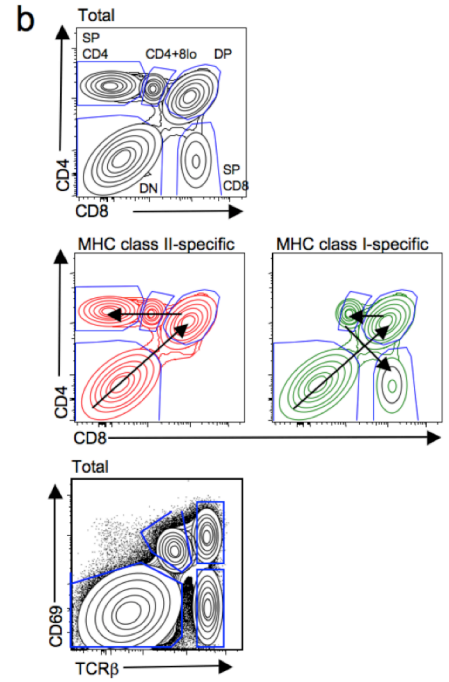



Suppl. Fig. 3 a

Mouse TGGAGTTTGGAAAATGTTCCCGGAGCTTCCCTGAAGCTAAATTTACCTC  
Human TGGAGTTTGGAAACTGTCCCTGAGCTTCCCTGAAGCTAAATTTGCCTC  
\*\*\*\*\*

Mouse CCCAGCCCTGGGGGGCGCAGAGATCCAGCGCGATTAGCACTGCGCTG  
Human CCCCGCCTTGGGGGGCGCAGAGATCCCGCGCGATTAGCGCTGCGCGG  
\*\*\*\* \* \* \*

Mouse CAGCGGGCTCCAGCCGAGAGGCCAGAATAGGCGCGAGTTATAAATAGT  
Human CAGCCGGCTCCAACCCAGAGGCCGAATAGGCGCGAGTTATAAATAGT  
\*\*\*\* \* \* \*

Mouse GCTACCCGAGGTGTGGGGGTAGTCGGCGGAGGGGG-TACCCCTGGCA  
Human GCCACCCGAGGTGTGGGGGTAGTCGGCGGAGGGGGTACCCCTGGCG  
\*\* \* \* \*

Mouse GCCACCGCTCTTCAGGTGGGTGGGGCTCGCGGTAGGGTTCTGGGG  
Human GCCACGGCCCTTCAGGTGGGTGGGGCTCGCGGTGGGAGCGTGGGG  
\*\*\*\*\* \* \* \*

Mouse GCGGCGGAGCGAGGGGCTGCGTCTGAGCGCCCCAGCGGTTCTCTGG  
Human GCGGGGGCTGGGGGCTGCGTCTGAGCGCCCCAGCGGTTCTCTGG  
\*\*\*\*\* \* \* \*

Mouse GCGGCGGTTTTCGAGGGAAGCGAGGAGCGCGGGAAGGGGCGGG  
Human GCGGCGGTTTTCGAGGGAAGCGAGGAGCGCGG--ATGGGGGGAG  
\*\*\*\*\* \* \* \*

Mouse GAGCAGGATTAGGTGGGCGCTGGAGCAGACCAGGAGCTGCTTTCAGC  
Human CAGCGGAGAAGAGGTGGGCGCTGGCGCATGCTGAGGCTCCGCTTGCAGC  
\*\*\* \* \* \*

Mouse TCAGTCCCC-CACCAGAAA  
Human TCAGCCCCCACAATCCGA-  
\*\*\*\* \* \* \*

Suppl. Fig. 3b

TasDev AGTCGTTTTGGAAACTCGTCCCTGAGCTTCTGGGGCTAAATTTAAAT  
Possum AGTAGTTTTGGAAACTTGTCCCGAGAGCTTCTGGGGCTAAATTTAAAT  
\*\*\* \* \* \*

TasDev TTACCTGCCTAGGCCCTGGGGGGCAGAAAGATCCCAGCGGAGATTAGCGC  
Possum TTACCTGCCTAGGCCCTGGGGGGCAGAAAGATCCCAGCGGAGATTAGAAC  
\*\*\*\*\* \* \* \*

TasDev GCTGCAGTAGACGACTCGGCACTCGGGGCTCGGAATAGGCACCGAGTTA  
Possum GTTGGAGTAGACGGTTTGCACCCGAAAGCCGGAATAGGCACCGAGTTA  
\* \* \* \* \* \*

TasDev TAAATAGAGCCGCCGAGATGCTAGTGGGGGAGACTGAGGAAAGGGAA  
Possum TAAATAGAGCCGCCGAGATGCTAGTGGGGGAGACTGAGGAAAGGGAA  
\*\*\*\*\* \* \* \*

TasDev GGGTACCCCC-GGCAGCGCGGCCCTTCAGGTGGGTGG-----  
Possum GGGTACCCCCAGCGAGCGCGGCTTTCAGGTGGGTGGTGGGTGG  
\*\*\* \* \* \*

TasDev GCGGTCGAGTGGCAGCGCTGGG-----TGGCGGCGGTGG  
Possum GCGGTCGCGTGGGAGCGCTGGGGGAGGGGAGGGGCGCGCGGTGA  
\*\*\*\*\* \* \* \*

TasDev GGGGCTGCGGTCTGGGCGCCCCAGCGGTTCTGGGCGGTGTA-CTT  
Possum GGGGCTGCGGTCTGGGCGCCCCAGTGGTTCTGGGCGGTGAAACTT  
\*\*\*\*\* \* \* \*

TasDev CGAGGGAAGCGCGGAGGCGGTGGGGGGCCAAAAGTTAAGAGGTGGGCGC  
Possum CGAGGGAAGCGGTGGAAGCGGTGGGGGGCCAAAAGTTAAGAGGTGGGCGC  
\*\*\*\*\* \* \* \*

TasDev GCAGCAGGTATGCTCACTTGGGATTTCAGTTTTCTGCTA-AGAAGTAC  
Possum --AGCAGGTATACTCACTTGGGTCTCAGCTTCCCTGCTAGAGTTGTGGT  
\*\*\*\*\* \* \* \*

**Suppl. Fig. 3c**

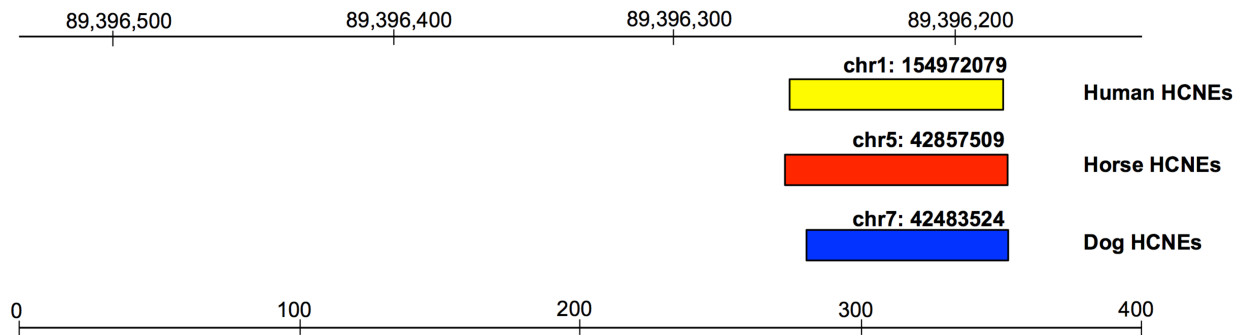

| Organism | Genome assembly      | Location                             | Size  |
|----------|----------------------|--------------------------------------|-------|
| Mouse    | NCBI Build 38 (mm10) | <u>chr3:89,396,182..89,396,257</u>   | 76 bp |
| Human    | NCBI Build 37 (hg19) | <u>chr1:154,972,079..154,972,154</u> | 76 bp |

**Alignment**

```

Mouse      CCGCGGCTGCCTCCGCTTCCCTCGAAAAACCCGCCGCCAGGAAACCGCTGGGGGCGCTC
Human      CCTCCGCTGCCTCCGCTTCCCTCGAAAAACCCGCCGCCAGGAAACCGCTGGGGGCGCTC
** * *****

Mouse      AGACCGCAGCCCCCTC
Human      AGACCGCAGACCCCC
*****  **** *
    
```

**Note:** the human sequence is reverse complemented in the alignment.

Similarity: 72 / 76 identical columns = 94.74%

Suppl. Fig. 3d

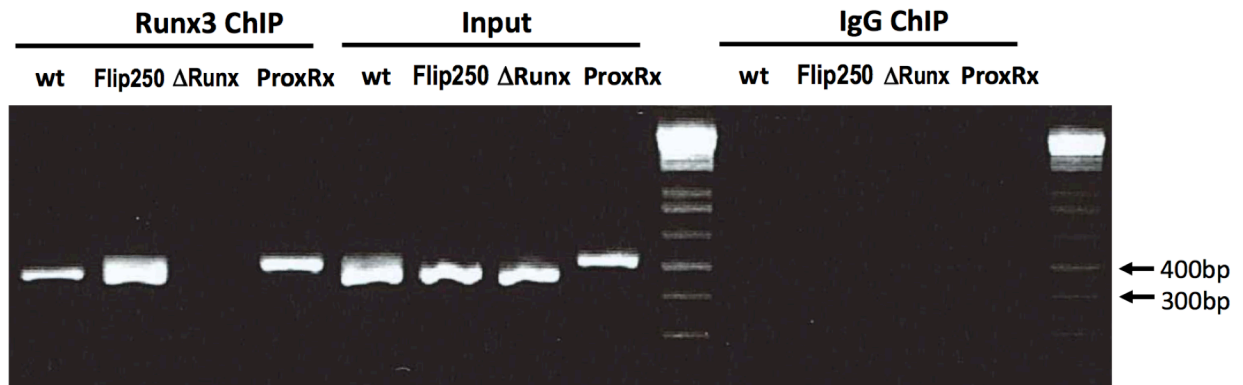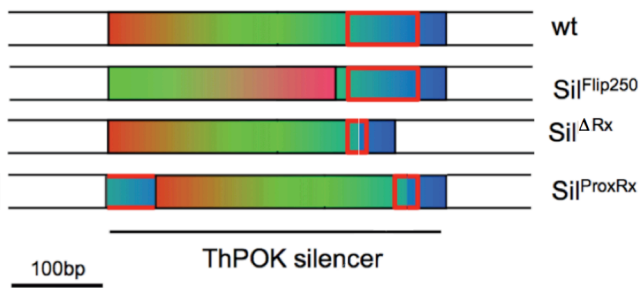

Suppl. Fig. 4a

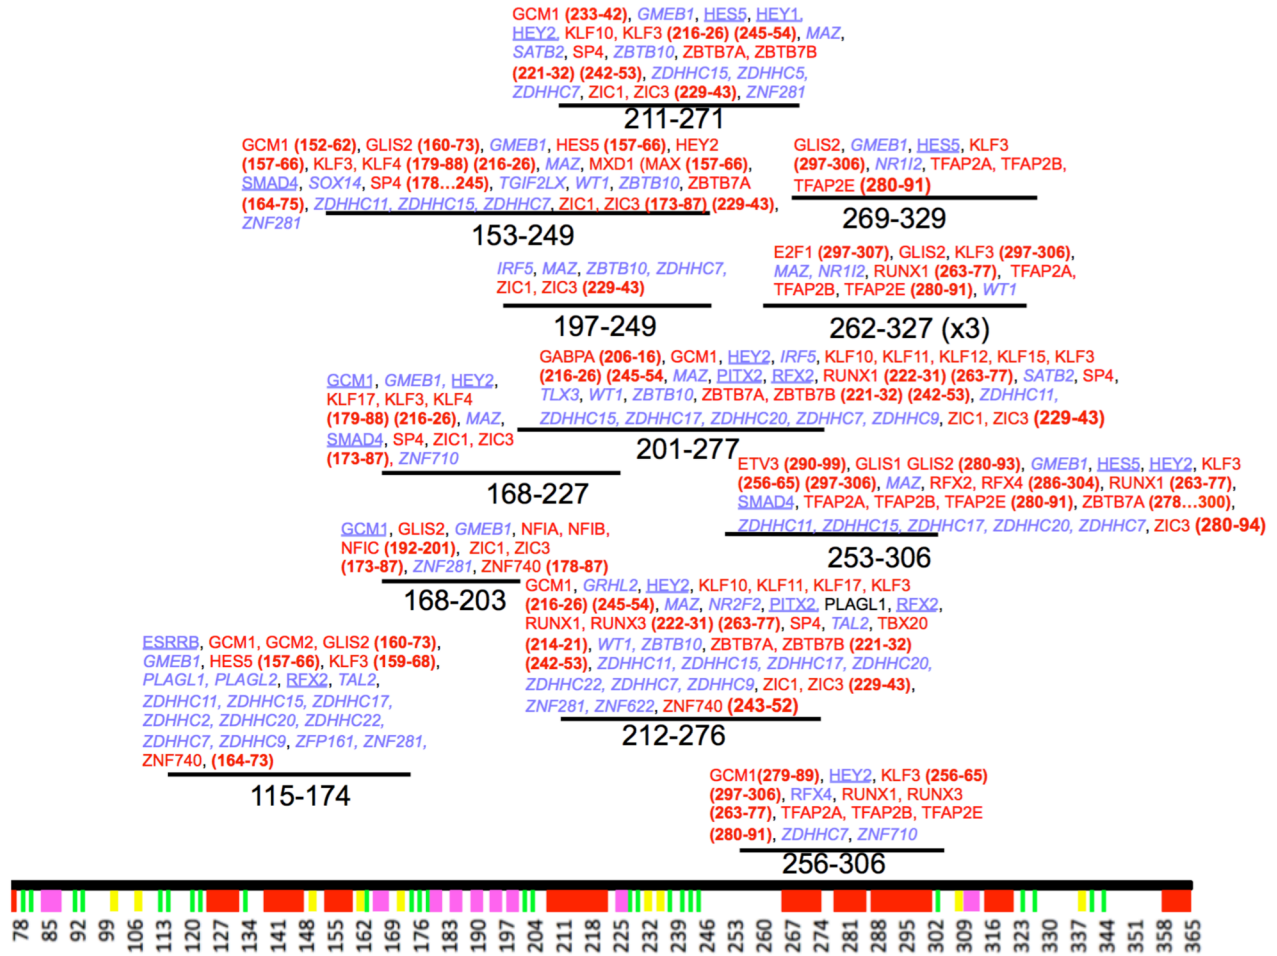

Suppl. Fig. 4b

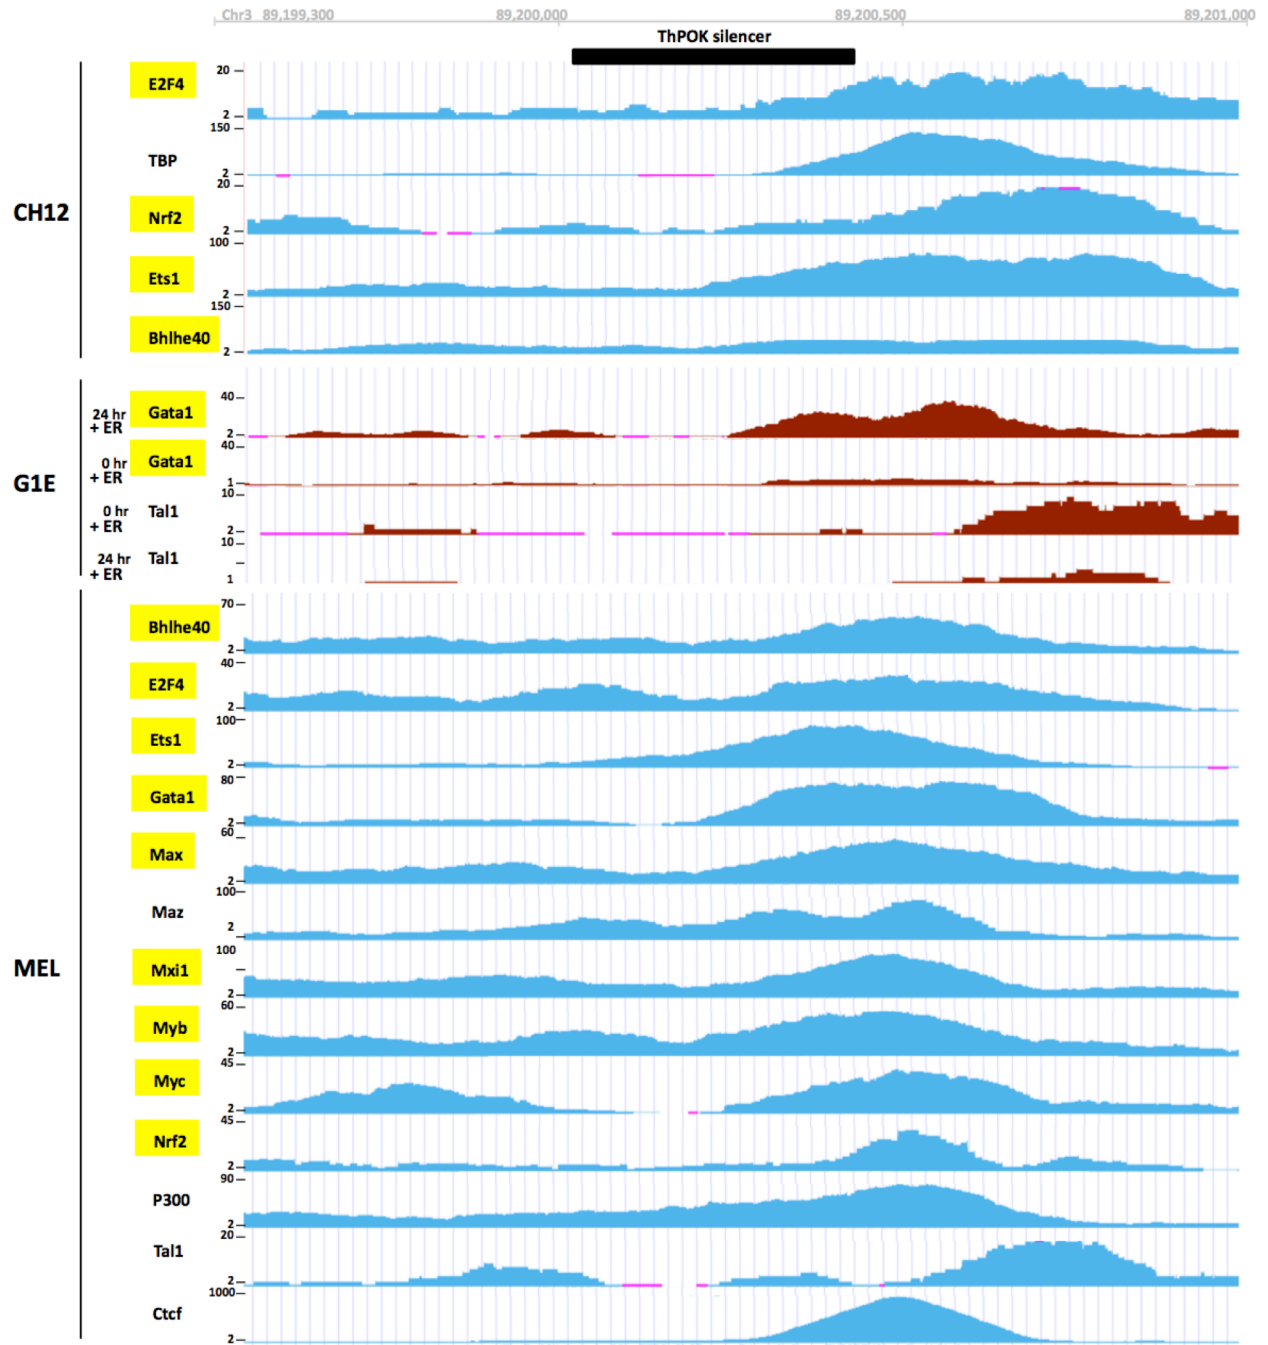

Suppl. Fig. 5

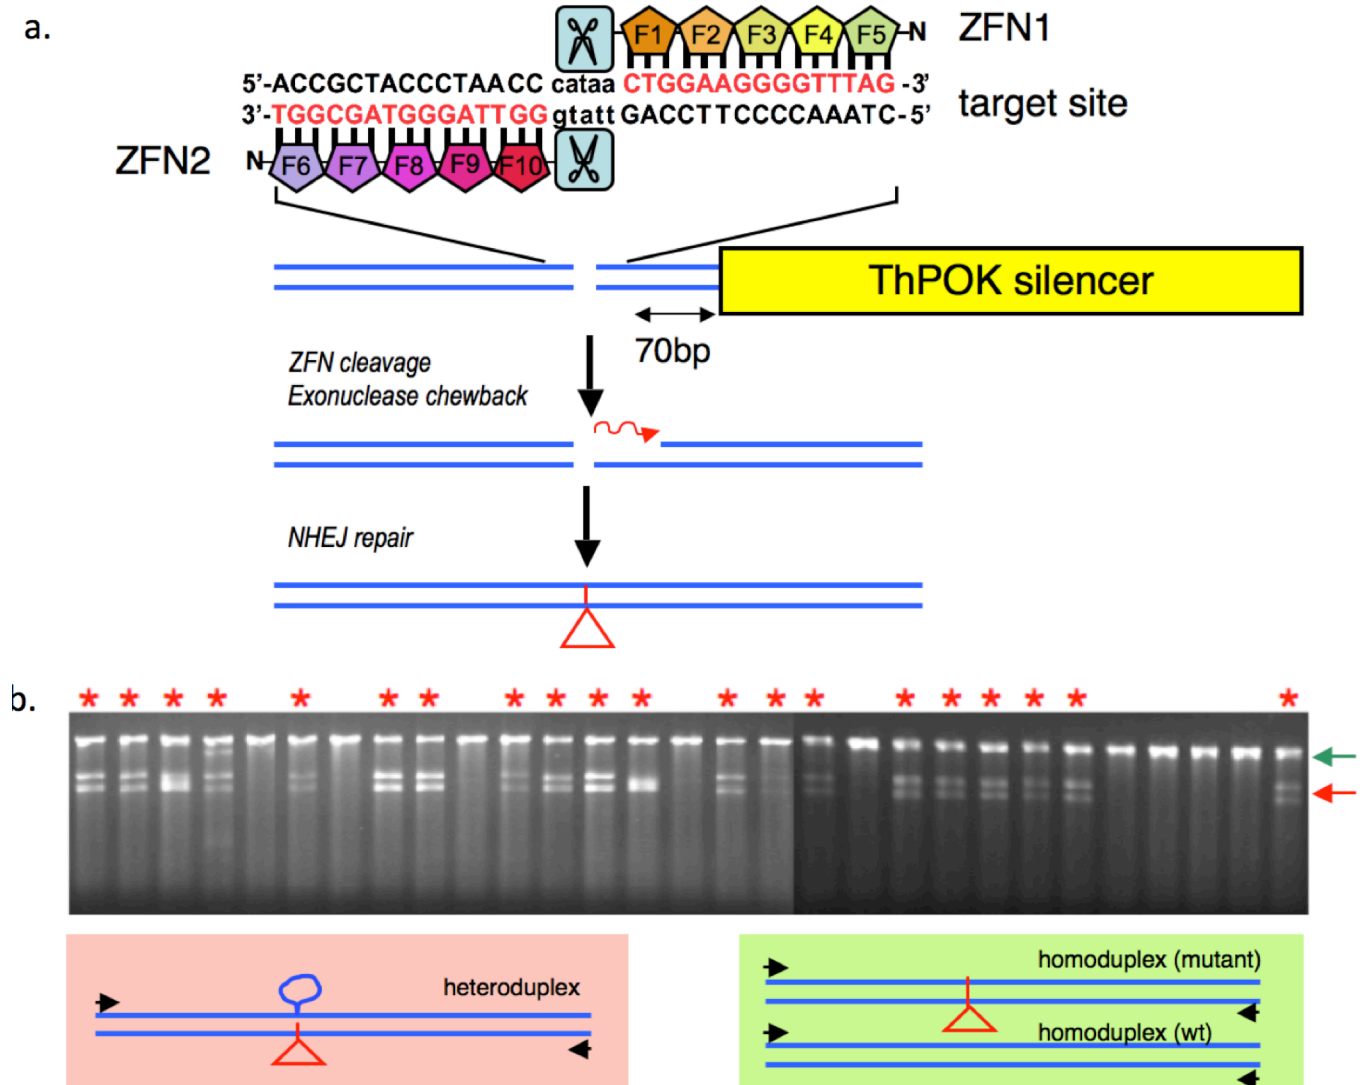



Suppl. Fig. 5

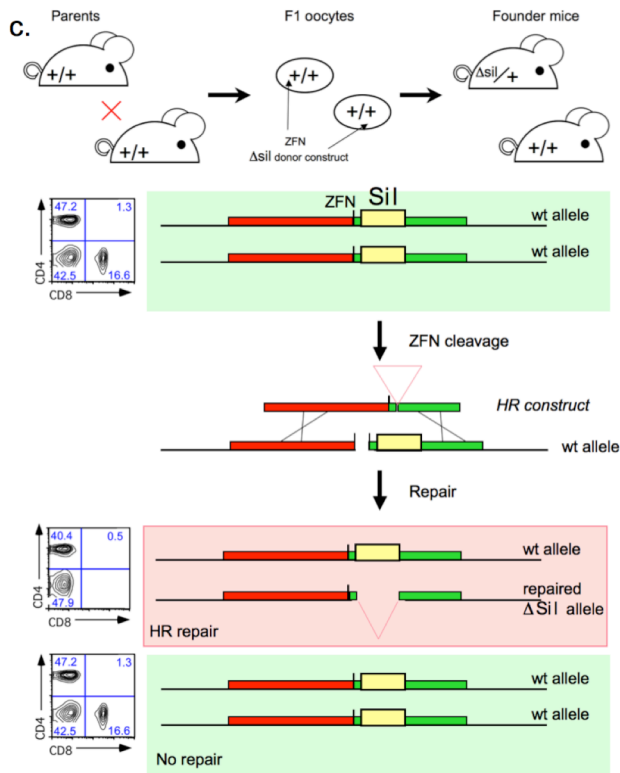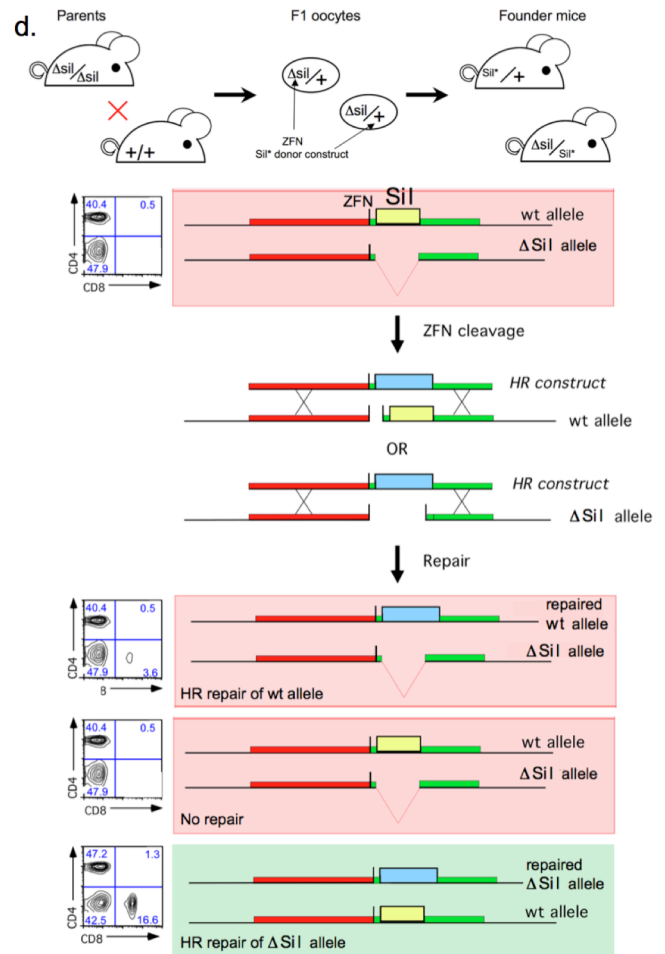

Suppl. Fig. 6

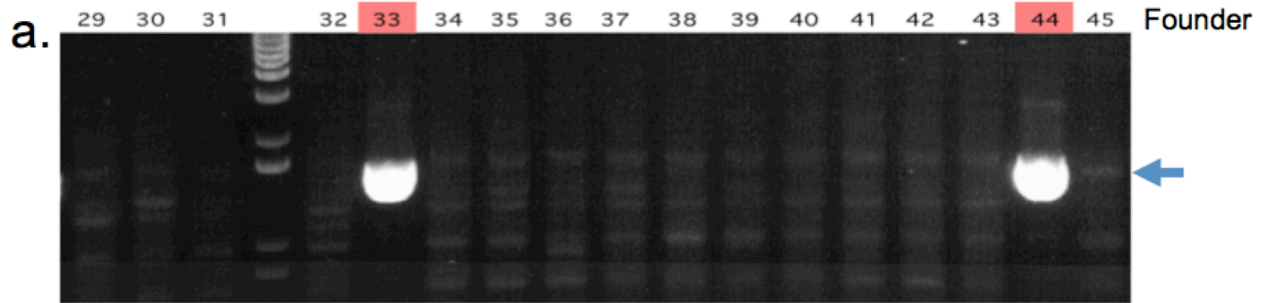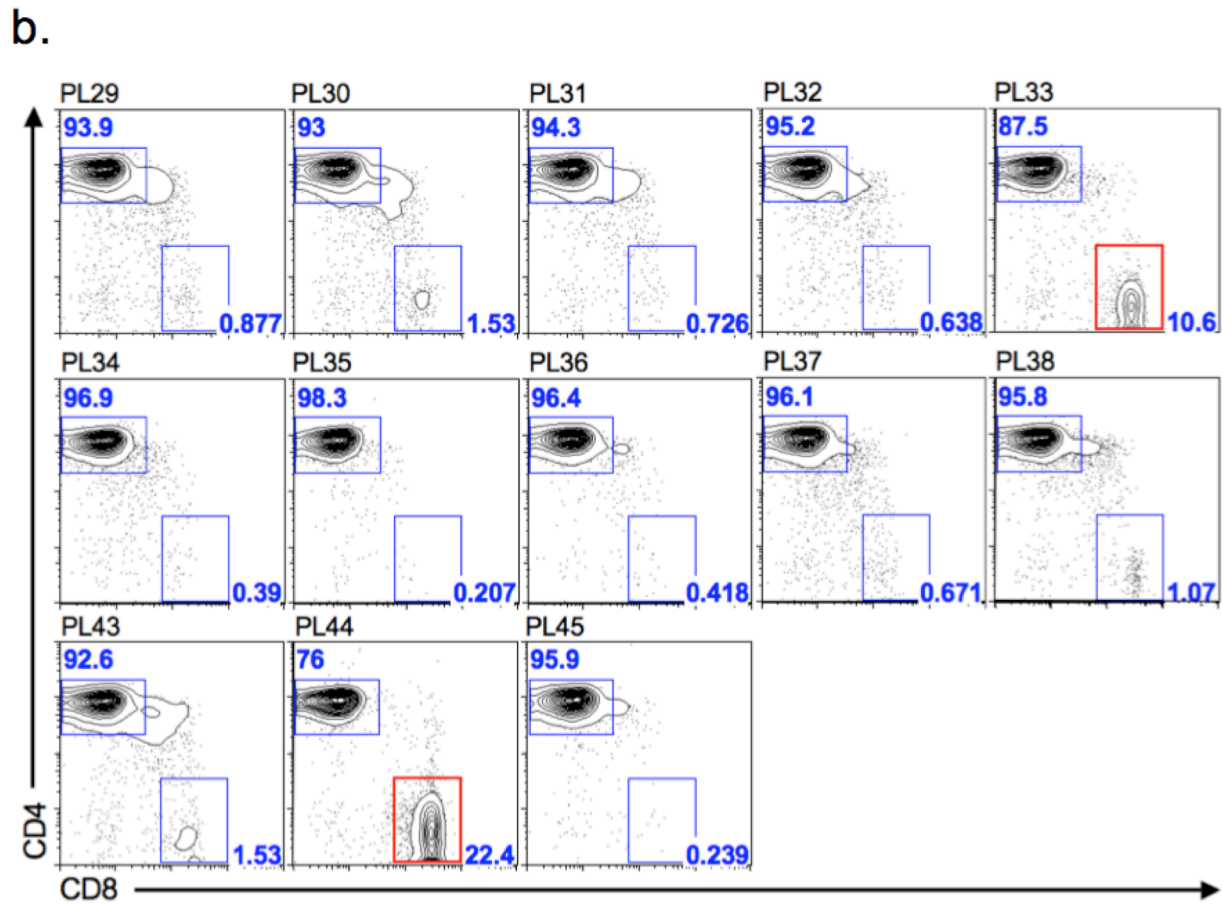

Suppl. Fig. 7

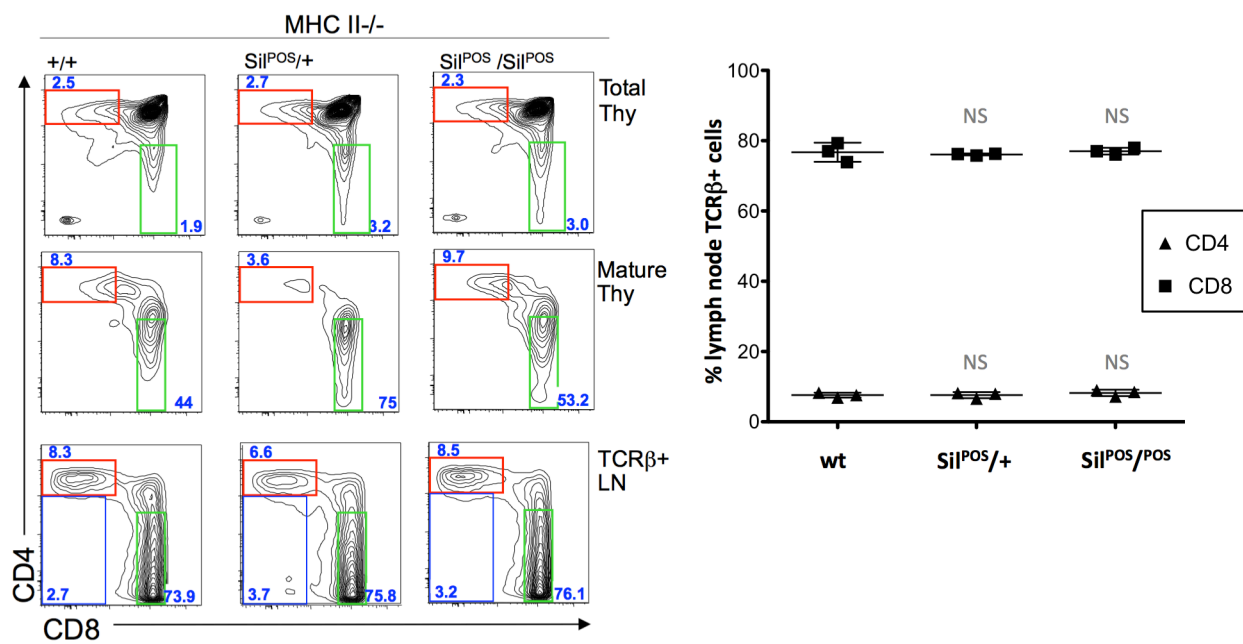

Suppl. Fig. 8

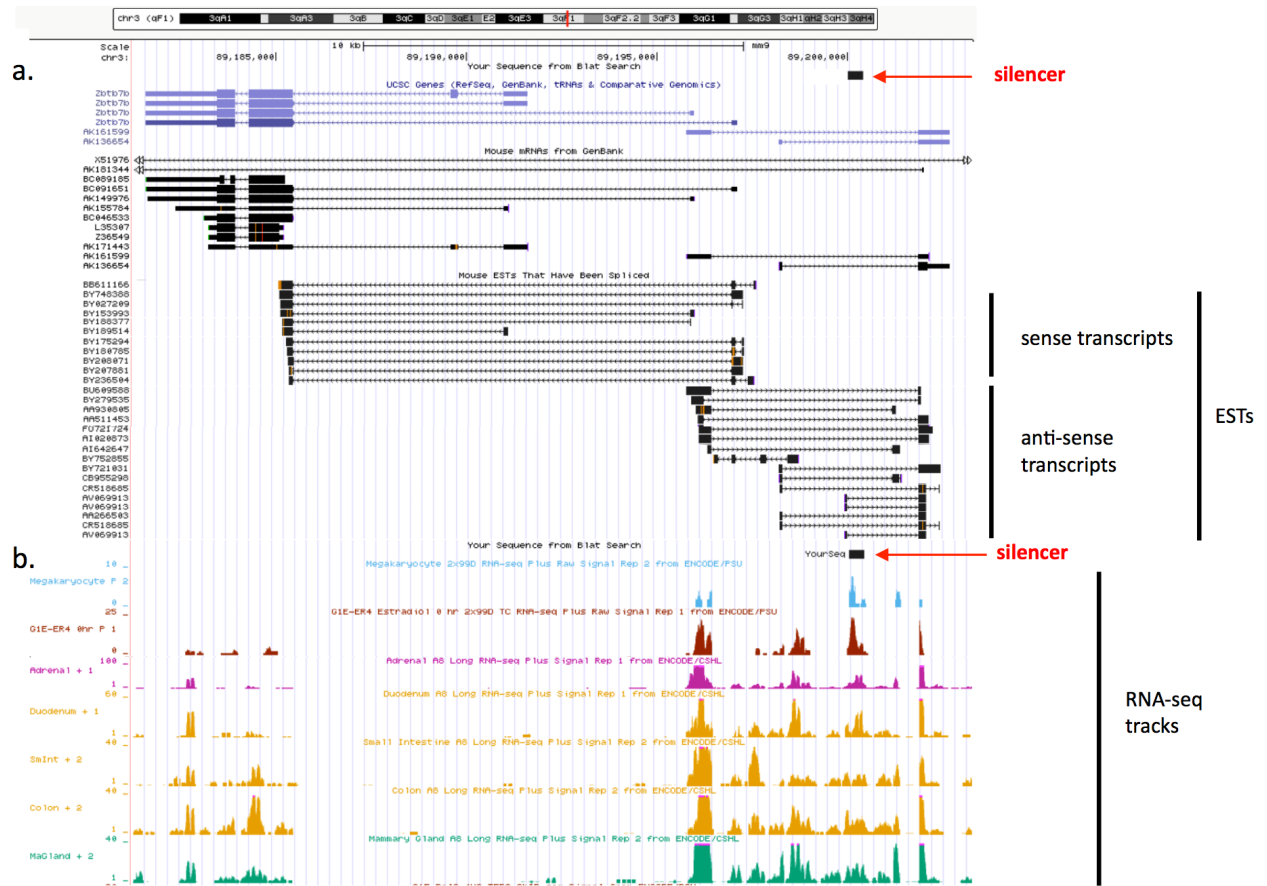

Suppl. Fig. 9

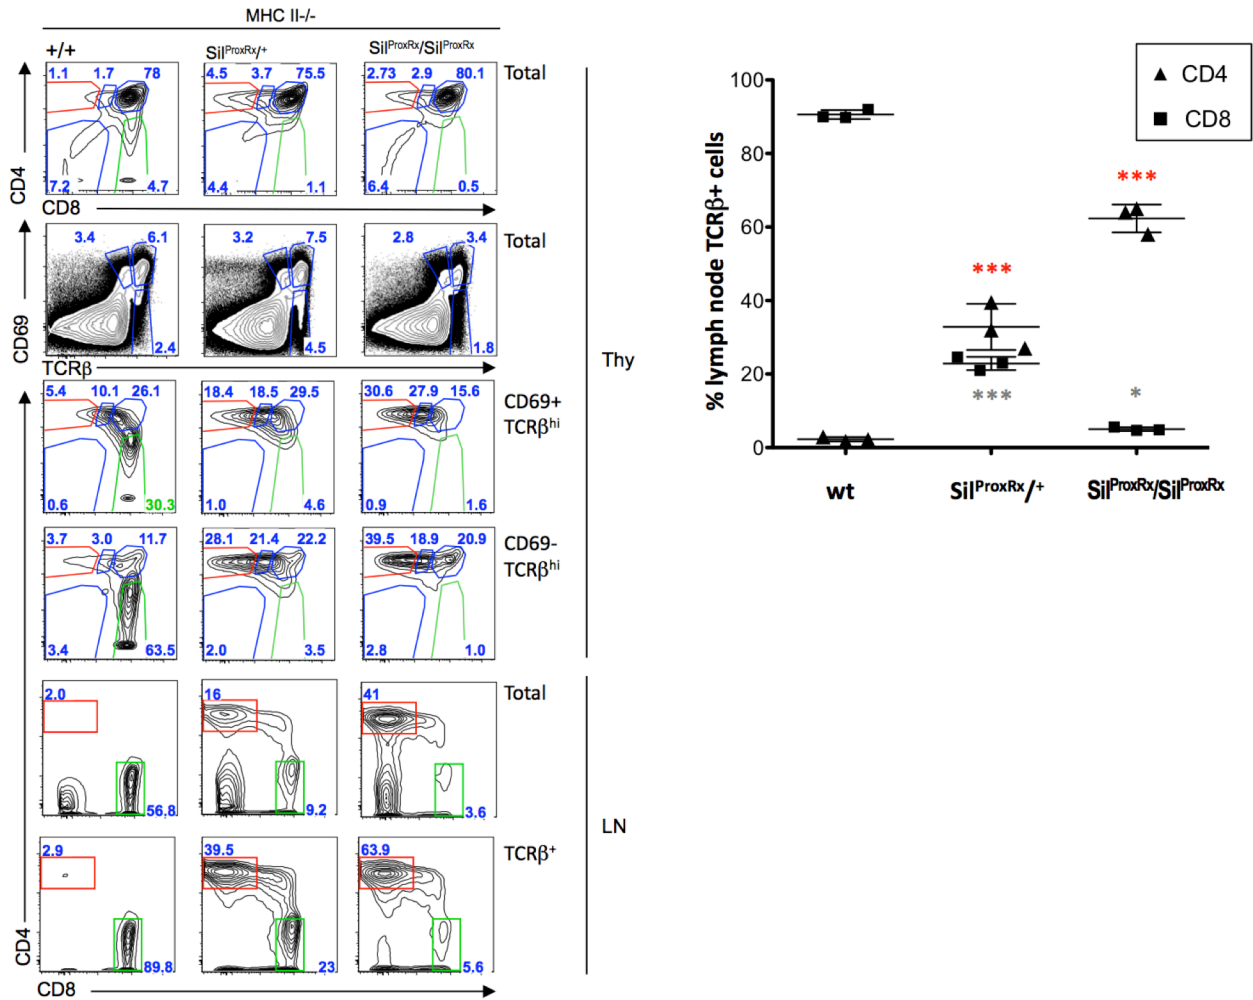

**SUPPLEMENTARY FIGURE LEGENDS**

**Suppl. Fig. 1. T lymphocyte development.** a) Diagram of stages in thymic development, including, in sequential order, double negative (DN), double positive (DP), intermediate CD4+8lo, and finally single-positive (SP) CD4 and CD8. Thymic development is also marked by changes in expression of TCR and CD69 surface markers. TCR and CD69 surface markers are both upmodulated as thymocytes mature from the DP to the CD4+8lo stage and even further during subsequent transition to the SP CD4 and CD8 stages. Finally, just before exiting the thymus, SP thymocytes lose CD69 expression, but still maintain high TCR expression. Most peripheral T lymphocytes, from the blood, lymph nodes and spleen, exhibit the same TCR+ CD69- surface phenotype. At the CD4+8lo stage, MHC class II- and class I-specific cells express high or low levels of ThPOK, respectively, and diverge into alternate CD4 and CD8 lineages. b) Surface expression pattern of CD4, CD8, CD69 and TCR by total thymocytes, or by MHC class I- or II-specific thymocytes, as indicated. Diagrams are based on flow cytometric analysis of wt mouse thymocytes.

**Suppl. Fig. 2. Interspecies comparison of ThPOK non-coding exons.** a) Distal non-coding exons. b) Proximal non-coding exons. Dashes denote sequences that are genuinely lacking in the indicated species, whereas n's indicate artificial sequencing gaps due to incompleteness of genomic data. In the wallaby sequence, the entire proximal exon falls into such a sequencing gap. Blue and red type indicate identity between mouse and all marsupials or difference between mouse and at least one marsupial, respectively. Start site of each mouse exon and 3' splice sites are based on publicly available EST sequences.

**Suppl. Fig. 3. High conservation of ThPOK silencers between marsupials and between placental mammal species.** CLUSTAL alignments of ThPOK silencers from **a)** 2 placental mammals (mouse vs human), and **b)** 2 marsupials (opossum vs. Tasmanian devil). ThPOK silencers of human and mouse show 87% identity, and opossum (S. American) and Tasmanian devil (Australia) marsupials show 85% identity. Highly conserved syntenic block region is indicated by red box. **c)** Top panel shows alignment of highly conserved non-coding element (HCNE) for indicated placental mammal species with respect to mouse ThPOK silencer, according to ANCOR database (<http://ancora.genereg.net/cgi-bin/gbrowse/mm10/?name=chr3:89377644..89394776>). Genomic coordinates at top of panel refer to Mouse (mm10) genome assembly, coordinates at bottom to mouse ThPOK silencer numbering given in Fig. 2, above. Bottom panel shows alignment of indicated mouse and human HCNE sequences (note ANCOR analysis is for reverse complement compared to Figure 2). **d)** Anti-Runx3 chromatin immunoprecipitation (ChIP) of sorted peripheral CD4 T cells from wt or indicated homozygous mutant mice. The PCR primers used span the ThPOK silencer. Results are typical of 3 independent experiments.

**Suppl. Fig. 4. Experimental validation of predicted TF binding to mouse ThPOK silencer.** **a)** 12 different mouse ThPOK silencer fragments (indicated by thin black bars) were tested as bait in Y1H analyses against an array of 1,086 different mammalian TFs and chromatin binding factors. Factors that bind to each fragment are listed above the corresponding line. Factors that are also predicted to bind to a particular fragment by JASPAR algorithm are marked in red (along with predicted coordinates in brackets). **b)** ChIP analysis with antibodies against indicated transcription factors for 3 mouse cell lines (CH12, B-cell lymphoma; G1E, erythroid line; MEL,

CML-like leukemia cell line). Yellow indicates factors whose binding is predicted by JASPAR analysis. ChIP data is derived from UCSC Genome Browser (NCBI37/mm9 mouse genome assembly).

**Suppl. Fig. 5. Strategy for in vivo mutagenesis of ThPOK silencer.** a), b), c) Generation of  $Sil^{\Delta}$  allele. Site-specific ZFN and homologous repair (HR) construct that lacks the ThPOK silencer are coinjected into single-cell  $+/+$  oocytes (a), leading to generation of a double-stranded break at the ZFN site located 50bp upstream of the ThPOK silencer, which undergoes HR-mediated repair to generate mice carrying the  $Sil^{\Delta}$  allele (b). The  $Sil^{\Delta}$  allele causes dominant constitutive expression of ThPOK, leading to exclusive generation of CD4 T cells in  $Sil^{\Delta}/+$  mice, as revealed by FACS analysis of peripheral blood (c). d) Generation and phenotyping of mice containing mutant Silencer alleles. Site-specific ZFN and homologous repair (HR) construct that contains variant ThPOK silencer are coinjected into single-cell  $Sil^{\Delta}/+$  oocytes, leading to generation of a double-stranded break at the ThPOK silencer, which undergoes HR-mediated repair to generate mice carrying the mutant Silencer allele. If the mutant Silencer construct is inserted into the  $Sil^{\Delta}$  allele, it will potentially correct dominant constitutive expression of ThPOK, leading to restoration of CD8 T cells in  $Sil^{\Delta}/+$  mice (bottom right panel in d). In panels c and d, yellow boxes indicate the mouse ThPOK silencer, while red and green boxes indicate adjacent arms of homology included in targeting constructs. The blue box indicates the opossum ThPOK silencer.



**Suppl. Fig. 6. Generation of ThPOK-Sil<sup>POS</sup> mice.** a) PCR typing of panel of founder mice derived from oocytes injected with the opossum-silencer knockin construct. One of PCR primers used is specific to results with primers specific to the opossum silencer. Note that 2 of 17 mice show a specific band (whole panel of 30 founders yielded 3 positives). b) FACS analysis of peripheral blood samples from partial set of 13 founders mice derived from oocytes injected with the opossum-silencer knockin construct. Note that two PCR positive mice from panel a (PL33 and PL44) show restoration of CD8 T cells, indicating that  $\Delta$ Sil allele was corrected by homologous recombination.

**Suppl. Fig. 7. Marsupial ThPOK silencer supports normal development of MHC class I-restricted thymocytes.** FACS analysis of CD4, and CD8a expression in indicated thymocyte and lymph node subsets from mice lacking expression of MHC class II. Plot at right shows % of SP CD4 and CD8 cells within gated TCR $\beta$ <sup>+</sup> lymph node fraction (n = 3, for each strain). Error bars represent standard deviations. Significant differences between mutant and wt mice were determined by paired T test, and indicated by asterisks (\* p>0.01; \*\* p> 0.005; \*\*\* p> 0.001).

**Suppl. Fig. 8. ThPOK silencer is transcribed in opposite orientation to ThPOK gene in multiple different cell types.** a) Organization of ThPOK (Zbtb7b) gene and reverse transcripts (including AK161599, AK136654) that originate near 5' end of ThPOK gene. b) Transcripts defined by RNA-seq analysis for indicated cell types, revealing reverse transcripts overlapping with the ThPOK silencer. MaGland = mammary gland; SmInt = small intestine. Modified from USCS genome browser (<http://genome.ucsc.edu/>).

**Suppl. Fig. 9. Altering motif grammar of ThPOK silencer disrupts silencing function.**

FACS analysis of CD4, and CD8a expression in indicated thymocyte and lymph node subsets from wt (+/+), heterozygous and homozygous  $Sil^{ProxRx}$  mice lacking expression of MHC class II. Plot at right shows % of SP CD4 and CD8 cells within gated  $TCR\beta^+$  lymph node fraction (n = 3, for each strain). Error bars represent standard deviations. Significant differences between mutant and wt mice were determined by paired T test, and indicated by asterisks (\*  $p > 0.01$ ; \*\*  $p > 0.005$ ; \*\*\*  $p > 0.001$ ).
